# Supplementary material
Source: publisher figshare collection journal article supplement (https://gsajournals.figshare.com/ndownloader/files/26016647)
Supplement: Supplementary file 1 [file 26016647]

## Sheet: table S5
Table S5. List of Caenorhabditis strains used in this study.
Strain name	Strain description	Genotype
N2	Inbred C. elegans wild isolate	WT
DG3913	C. elegans endogenous GFP::LIN-41 tag	lin-41(tn1541) I
NKZ35	Inbred C. inopinata wild isolate	WT
QG122	C. kamaaina wild isolate	WT
NIC564	C. waitukubuli wild isolate	WT
QG702	C. panamensis wild isolate	WT
JU2079	Inbred C. nouraguensis wild isolate	WT
QG704	C. becei wild isolate	WT
JU2083	Inbred C. macrosperma wild isolate	WT
JU2788	Inbred C. sulstoni wild isolate	WT
VT3978	C. sulstoni endogenous GFP::LIN-41 tag. Original strain: JU2788	lin-41(ma513)
JU1286	Inbred C. afra wild isolate	WT
DF5081	Inbred C. japonica wild isolate	WT
